# Supplementary material
Source: publisher figshare collection journal article supplement (https://frontiersin.figshare.com/ndownloader/files/13662224)
Supplement: Supplementary file 1 [file 13662224]

## Sheet: PCC Results
Phylogenetic Independent Contrasts (PIC) results
PCC (boxed if sig)	BRI (genus level if <3 records)	μs'm	Df	corallite complexity	corallite width (mm)	% surface area coenosteum	SA:V (based on growth form)	cumulative fractallity	skeletal density (g cm-3)	growth rate (mm yr^-1)
BRI (genus level if <3 records)
μs'm	-0.24
Df	-0.021	0.224
corallite complexity	0.155	0.014	0.248
corallite width (mm)	0.037	-0.061	0.036	0.809
% surface area coenosteum	-0.017	0.299	0.302	-0.235	-0.359
SA:V (based on growth form)	-0.07	-0.113	-0.677	-0.244	-0.1	-0.227
cumulative fractallity	-0.08	0.14	0.17	-0.02	0.08	0.1	0.4
skeletal density (g cm-3)	-0.003	-0.4	-0.844	-0.348	-0.033	-0.303	0.633	0.17
growth rate (mm yr^-1)	0.119	-0.292	-0.034	-0.103	-0.116	0.041	0.104	0.16	0.085
